# Supplementary material for: Unveiling the multifaceted antiproliferative efficacy of Cichorium endivia root extract by dual modulation of apoptotic and inflammatory genes, inducing cell cycle arrest, and targeting COX-2
Source: Royal Society of Chemistry journal article supplement (doi:10.1039/d4ra02131b), 2024-01-01
Supplement: d4ra02131b1.pdf [file d4ra02131b1.pdf]

## **Supplementary Information**

**Unveiling the Multifaceted Antiproliferative Efficacy of *Cichorium endivia* Root Extract by Dual Modulation of Apoptotic and Inflammatory Genes, Inducing Cell Cycle Arrest, and Targeting COX-2**

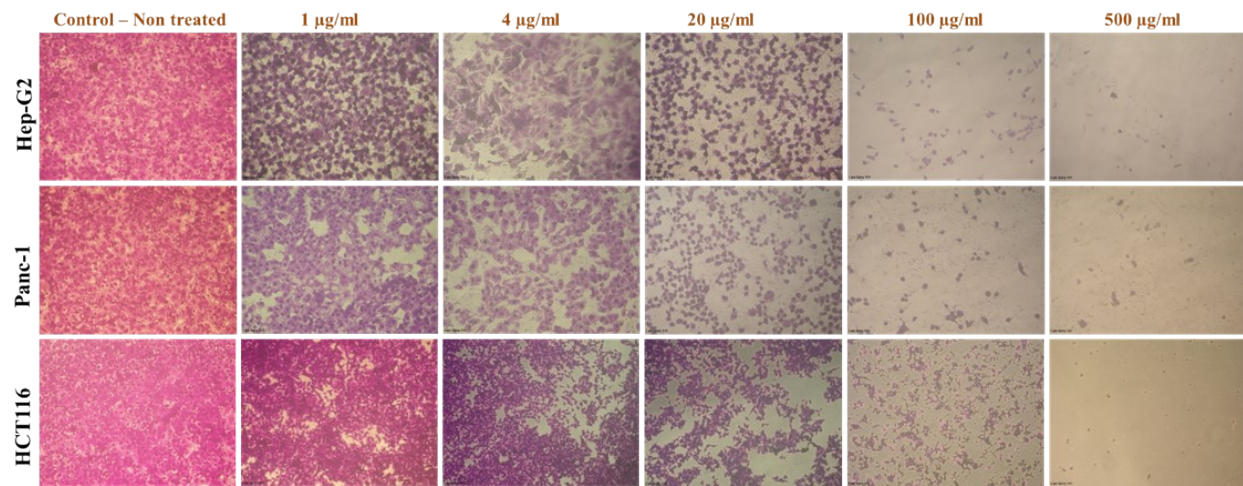

**Figure S1:** Evaluation of the morphological changes of HepG-2, Panc-1, and HCT-116 cells after treatment with CIR extract for 24 h at a concentration of 1, 4, 20, 100, and 500  $\mu\text{g/mL}$  concentration.

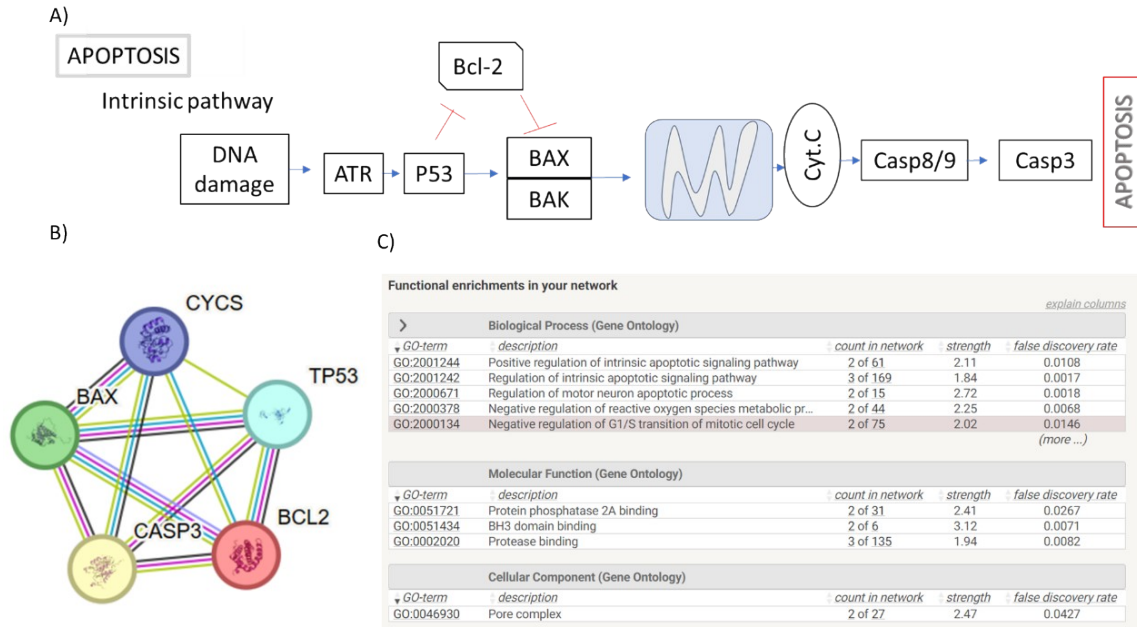

**Figure S2:** A) KEGG analysis of the apoptosis pathway highlighting the genes playing key roles in the intrinsic apoptosis pathway (Casp3, Bax, Bcl-2, P53, and CYC genes), image reproduced from [KEGG PATHWAY: Apoptosis - Reference pathway](#) and [KEGG PATHWAY: Apoptosis - multiple species - Reference pathway](#) and Hendrata et al., 2016 (1, 2). B) Protein-protein interaction network for the investigated genes involved in apoptosis. Nodes represent proteins, and edges denote predicted associations. The colored lines indicate different types of evidence, with red representing fusion evidence, light blue representing database evidence, green representing neighborhood evidence, blue representing cooccurrence evidence, purple representing experimental evidence, black representing coexpression evidence, and yellow representing text mining evidence, interaction scores are detailed in supplementary [table S5](#). STRING analysis (3). C) **Gene ontology and Functional enrichment** of the implicated proteins with the respective code of the involved processes (accessed on 15th February 2024, [String Database](#)) (3).

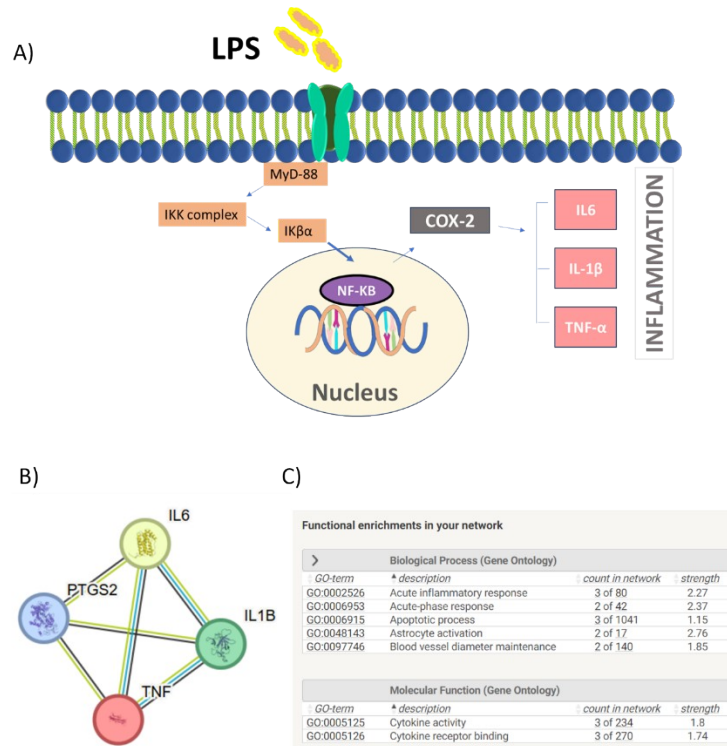

**Figure S3:** IL-1b, IL-6 and TNF- $\alpha$  as selected inflammatory markers associated with the COX2 mediator, as shown by the KEGG pathway and illustrated by Khan et al., 2012 and Arulselvan et al., 2016 (1, 4, 5). **B)** Protein- protein interaction network for the investigated proteins involved in the inflammatory process. Nodes represent proteins, and edges denote predicted associations. The colored lines indicate different types of evidence, with red representing fusion evidence, light blue representing database evidence, green representing neighborhood evidence, blue representing co-occurrence evidence, purple representing experimental evidence, black representing co-expression evidence and yellow representing text mining evidence, interaction scores are detailed in supplementary **table S4**. STRING analysis (3). **C) Gene ontology and functional enrichment** of the involved proteins with the respective code of the implicated processes (accessed on 15th February 2024, [String Database](https://string-db.org/)) (3).

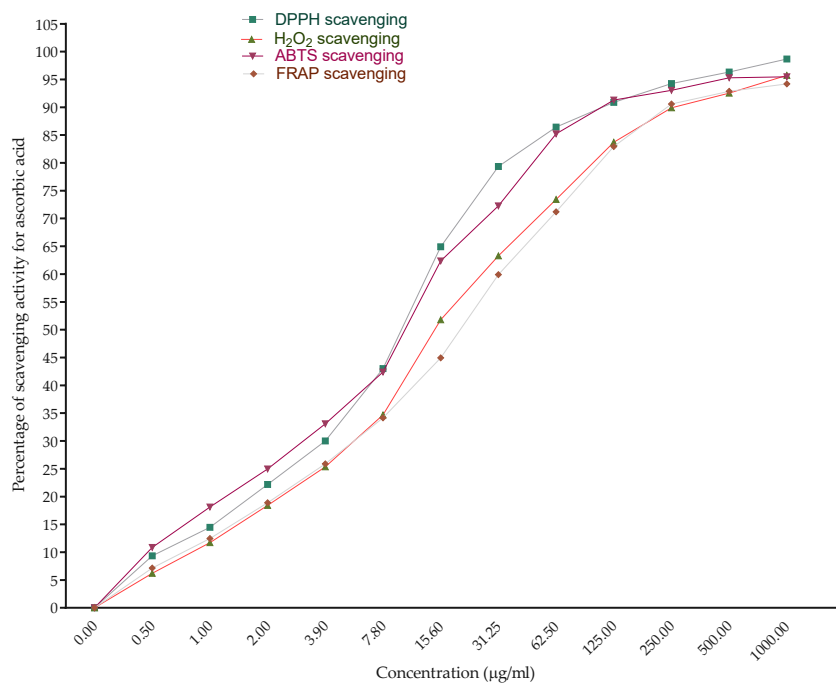

**Figure S4:** The dose-dependent scavenging activity of ascorbic acid against the DPPH radical, the H<sub>2</sub>O<sub>2</sub> radical, the ABTS radical and FRAP.

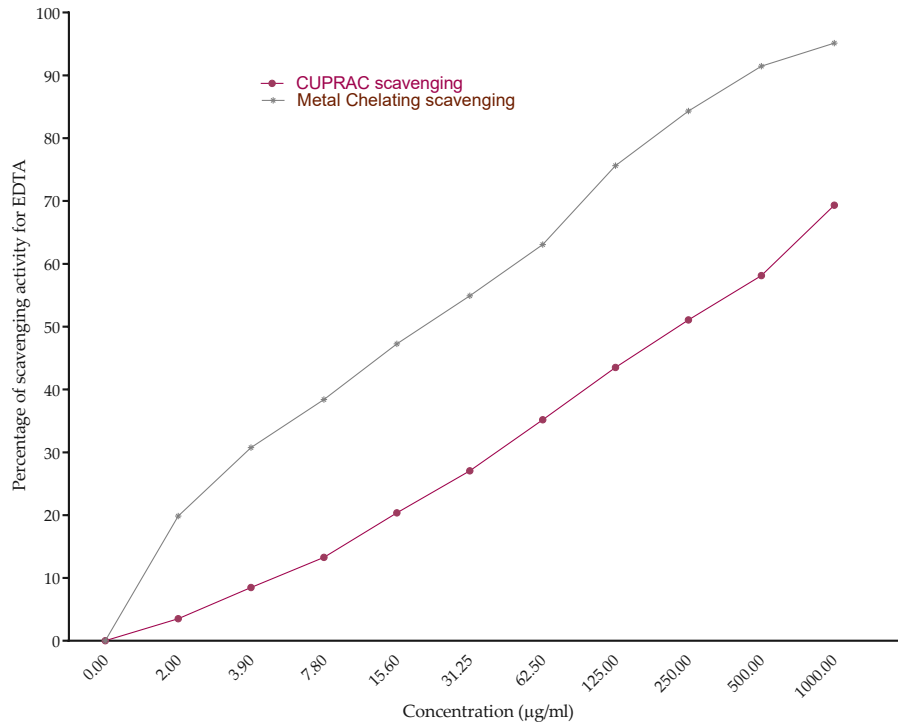

**Figure S5:** Dose-dependent scavenging activity of EDTA in relation to CURPAC and metal chelating activity.

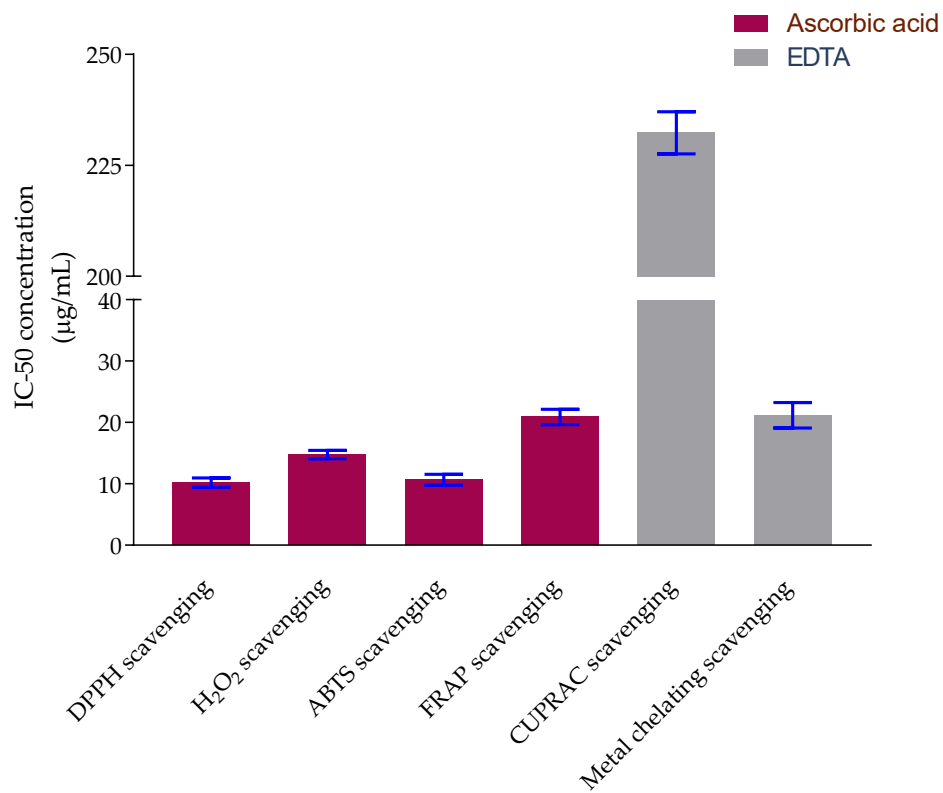

**Figure S6:** Representative diagram for the IC<sub>50</sub> values of ascorbic acid and EDTA in respect of DPPH, H<sub>2</sub>O<sub>2</sub>, ABTS, FRAP, CURPAC and metal-chelating scavenging assays. Data were expressed as mean ± S.D in triplicate.

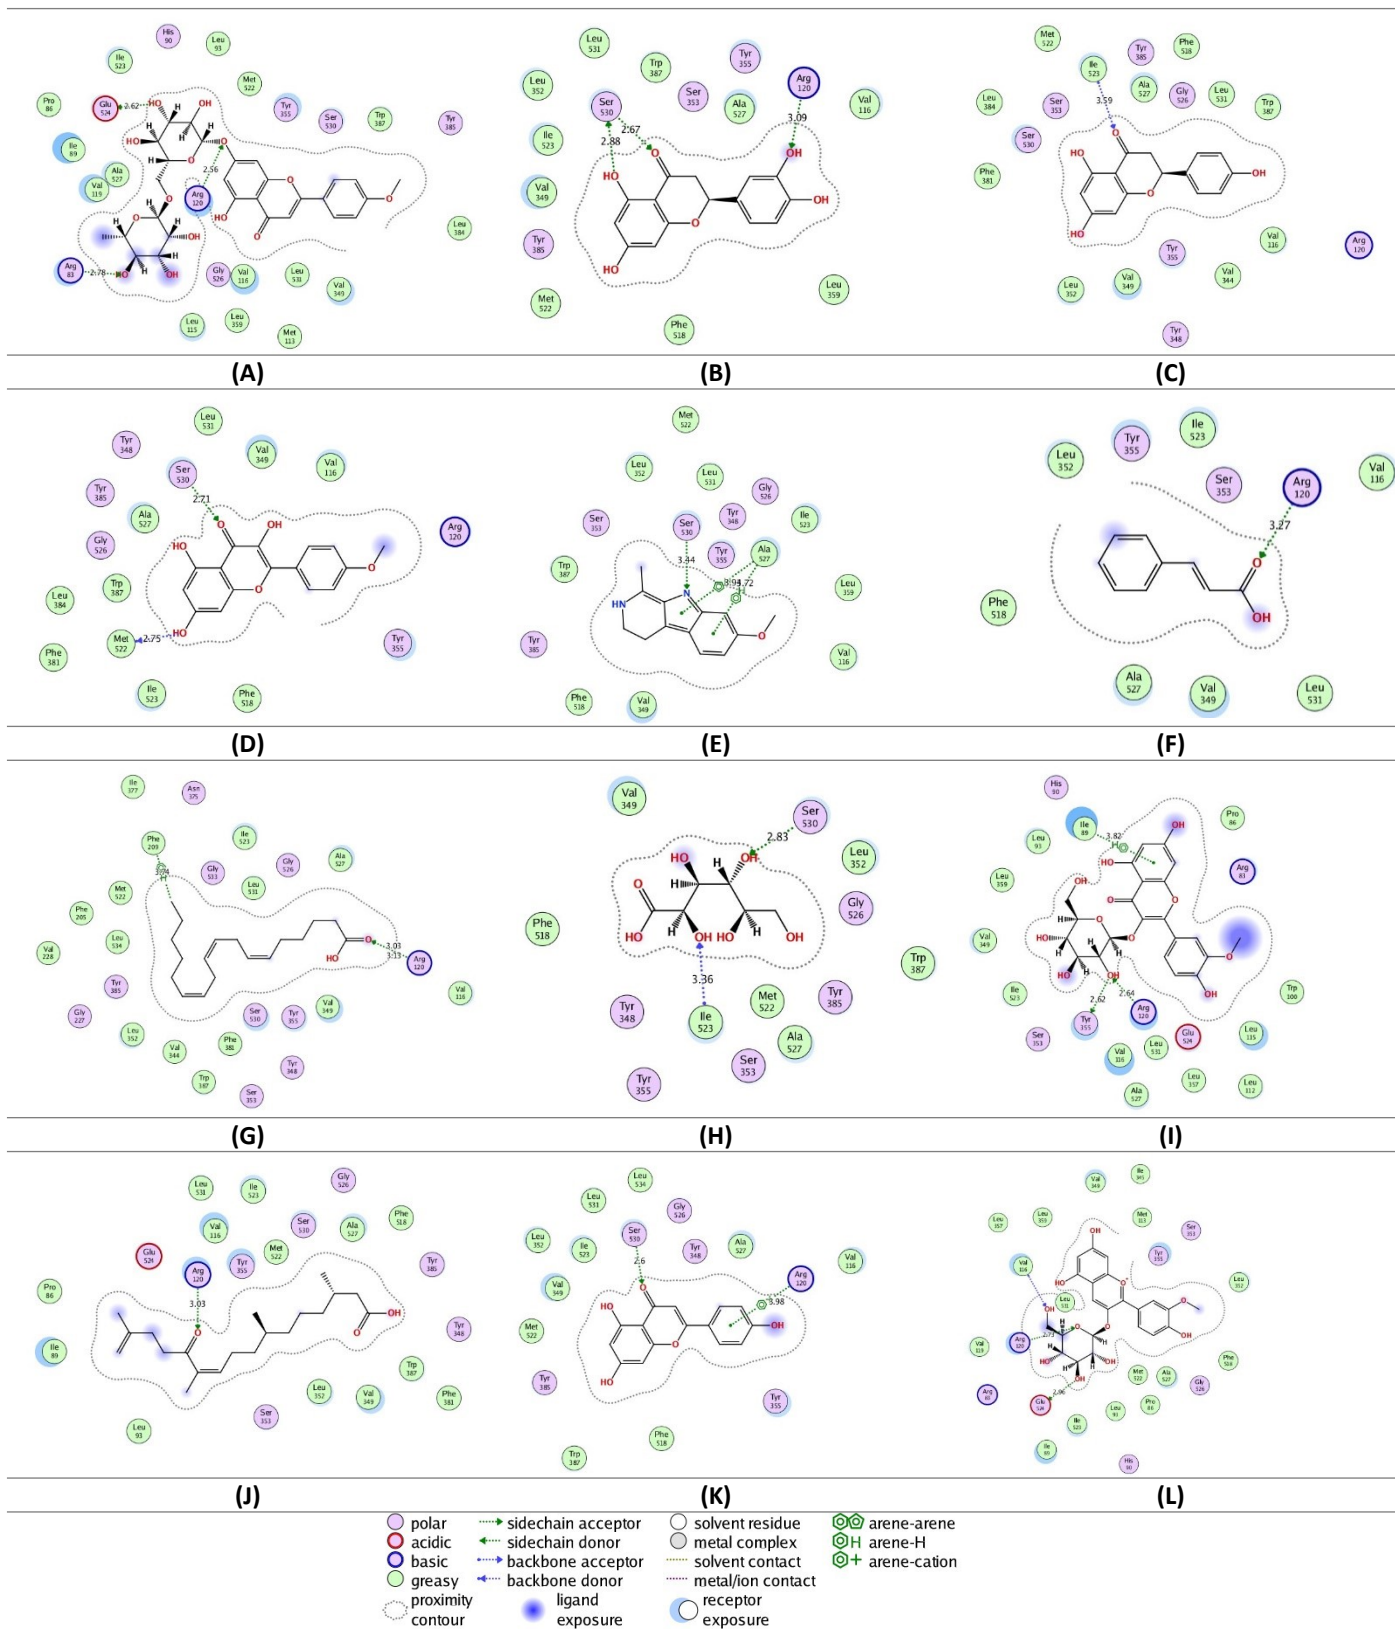

**Figure S7:** 2D representation of the binding mode of selected secondary metabolites identified in the CIR extract to the binding cavity of the COX-1 protein (PDB code: *1eqg*). **(A)** Acacetin-7-O-rutinoside; **(B)** 3', 4', 5, 7-tetrahydroxy-flavanone; **(C)** Naringenin; **(D)** 3, 5, 7-trihydroxy-4'-methoxy-flavone; **(E)** Harmaline; **(F)**



*trans*-Cinnamate; **(G)**  $\gamma$ -Linolenic acid; **(H)** Gluconate; **(I)** Isorhamnetin-3-O-glucoside; **(J)** 12-Oxo-10,15(Z)-Phytodienoic acid; **(K)** Apigenin; **(L)** Peonidine-3-O-glucoside.



*trans*-Cinnamate; **(G)**  $\gamma$ -Linolenic acid; **(H)** Gluconate; **(I)** Isorhamnetin-3-O-glucoside; **(J)** 12-Oxo-10,15(Z)-Phytodienoic acid; **(K)** Apigenin; **(L)** Peonidine-3-O-glucoside.

**Table S1:** The list of gene primers used for the apoptotic and anti-inflammatory study.

| Primer                         | Sequence                                                              | Reference |
|--------------------------------|-----------------------------------------------------------------------|-----------|
| <b>Bax</b>                     | F 5'- TCAGGATGCGTCCACCAAGAAG -3',<br>R 5'- TGTGTCCACGGCGGCAATCATC-3'  | [26]      |
| <b>Bcl2</b>                    | F 5'- ATCGCCCTGTGGATGACTGAGT -3'<br>R 5'- GCCAGGAGAAATCAAACAGAGGC -3' | [27]      |
| <b>Casp3</b>                   | F 5'- GGAAGCGAATCAATGGACTCTGG-3'<br>R 5'- GCATCGACATCTGTACCAGACC-3'   | [25]      |
| <b>p53</b>                     | F 5'-CCTCAGCATCTTATCCGAGTGG -3'<br>R 5'-TGGATGGTGGTACAGTCAGAGC -3'    | [28]      |
| <b>CYC</b>                     | F 5'-AAGGGAGGCAAGCACAAGACTG -3'<br>R 5'-CTCCATCAGTGTATCCTCTCCC -3'    | [29]      |
| <b>GAPDH</b>                   | F 5'- GTCTCCTCTGACTTCAACAGCG-3'<br>R 5'- ACCACCCTGTTGCTGTAGCCAA-3'    | [30]      |
| <b>IL-1<math>\beta</math></b>  | F 5'-CCACAGACCTTCCAGGAGAATG -3'<br>R 5'-GTGCAGTTCAGTGATCGTACAGG -3'   | [31]      |
| <b>IL-6</b>                    | F 5'-AGACAGCCACTCACCTCTTCAG -3'<br>R 5'-TTCTGCCAGTGCCTCTTTGCTG -3'    | [32]      |
| <b>TNF-<math>\alpha</math></b> | F 5'-CTCTTCTGCCTGCTGCACTTIG -3'<br>R 5'-ATGGGCTACAGGCTTGTCACTC -3'    | [33]      |

**Table S2.** The list of total nutrients detected in the CIR extract.

| Nutrient              | Concentration               |
|-----------------------|-----------------------------|
| Total saponin content | 18.37 $\pm$ 0.121 mg AE/ g  |
| Ash                   | 1.59% $\pm$ 0.013           |
| Total tannins         | 2.26 $\pm$ 0.103 mg/mL      |
| Total proteins        | 48.11 $\pm$ 2.714 mg/mL     |
| Total lipids          | 3.66 $\pm$ 0.290 mg/g       |
| Total carbohydrates   | 1.45 $\pm$ 0.063 mg/g       |
| Total alkaloids       | 163.82 $\pm$ 9.66 $\mu$ g/g |
| Total phenolics       | 55.708 $\pm$ 1.91 mg/mL     |
| Flavonoids            | 106.48 $\pm$ 4.17 mg/mL     |

**Table S3:** The list of metabolites detected in the *C. endivia* extract by UPLC/T-TOF-MS/MS spectrometer in positive ionization mode.

| Title                                     | RT (min) | Precursor (m/z) | Area     | Error (PPM) | Adduct             | Reference (m/z) | Formula    | Ontology                             |
|-------------------------------------------|----------|-----------------|----------|-------------|--------------------|-----------------|------------|--------------------------------------|
| <b>Acacetin-7-O-rutinoside</b>            | 24.031   | 593.2783        | 12237822 | 0.1         | [M+H] <sup>+</sup> | 593.18646       | C28H32O14  | Flavonoid-7-O-glycosides             |
| <b>3' 4' 5 7-tetrahydroxyflavanone</b>    | 5.271    | 289.163         | 7469832  | 0.8         | [M+H] <sup>+</sup> | 289.07068       | C15H12O6   | Flavanones                           |
| <b>Naringenin</b>                         | 7.527    | 273.1644        | 4594841  | 13.8        | [M+H] <sup>+</sup> | 273.07574       | C15H12O5   | Flavanones                           |
| <b>N,N-Dimethylglycine</b>                | 1.053    | 104.1062        | 4379100  | 3.9         | [M+H] <sup>+</sup> | 104.0706        | C4H9NO2    | Alpha amino acids                    |
| <b>3 5 7-trihydroxy-4'-methoxyflavone</b> | 19.662   | 301.1429        | 3023031  | 0.6         | [M+H] <sup>+</sup> | 301.07068       | C16H12O6   | Flavonols                            |
| <b>12-Oxo-10,15(Z)-Phytodienoic Acid</b>  | 1.117    | 293.0635        | 1886257  | -1.2        | [M+H] <sup>+</sup> | 293.21112       | C18H28O3   | Prostaglandins and related compounds |
| <b>Trigonelline</b>                       | 1.142    | 138.0552        | 1573969  | -0.1        | [M+H] <sup>+</sup> | 138.05496       | C7H7NO2    | Alkaloids and derivatives            |
| Harmaline                                 | 5.063    | 215.1256        | 1403891  | 0.1         | [M+H] <sup>+</sup> | 215.11789       | C13H14N2O  | Harmala alkaloids                    |
| <b>trans-Cinnamate</b>                    | 22.581   | 149.0246        | 1220626  | -1.9        | [M+H] <sup>+</sup> | 149.05971       | C9H8O2     | Cinnamic acids                       |
| Isorhamnetin-3-O-glucoside                | 6.793    | 479.12          | 1024418  | 0.8         | [M+H] <sup>+</sup> | 479.11841       | C22H22O12  | Flavonoid-3-O-glycosides             |
| <b>2'-Deoxycytidine</b>                   | 19.925   | 228.2302        | 800974   | 12          | [M+H] <sup>+</sup> | 228.09789       | C9H13N3O4  | Pyrimidine 2'-deoxyribonucleosides   |
| <b>DL-5-Hydroxylysine</b>                 | 1.181    | 163.058         | 673049   | 12.8        | [M+H] <sup>+</sup> | 163.10771       | C6H14N2O3  | Alpha amino acids                    |
| <b>L-Asparagine</b>                       | 1.298    | 133.0507        | 512950   | -4.8        | [M+H] <sup>+</sup> | 133.06078       | C4H8N2O3   | Asparagine and derivatives           |
| <b>Adenosine</b>                          | 2.407733 | 268.1045        | 464233   | 0.8         | [M+H] <sup>+</sup> | 268.10403       | C10H13N5O4 | Purine nucleosides                   |
| <b>Apigenin</b>                           | 11.05395 | 271.0616        | 459700   | 0.6         | [M+H] <sup>+</sup> | 271.06009       | C15H10O5   | Flavones                             |
| <b>Glycerophosphate(2)</b>                | 5.4784   | 173.0805        | 441894   | 1.8         | [M+H] <sup>+</sup> | 173.02095       | C3H9O6P    | Glycerophosphates                    |
| <b>Peonidine-3-O-glucoside chloride</b>   | 7.563967 | 463.1239        | 408484   | -0.8        | [M] <sup>+</sup>   | 463.12292       | C22H23O11  | Anthocyanidin-3-O-glycosides         |
| <b>4-AMINOPHENOL</b>                      | 0.898816 | 110.0085        | 405899   | 0.7         | [M+H] <sup>+</sup> | 110.06004       | C6H7NO     | Aniline and substituted anilines     |
| <b>D-Alloisoleucine</b>                   | 6        | 132.1012        | 325745   | 2.6         | [M+H] <sup>+</sup> | 132.1019        | C6H13NO2   | Isoleucine and                       |

|                                                  |          |          |        |        |                    |           |                 |  |                                                     |
|--------------------------------------------------|----------|----------|--------|--------|--------------------|-----------|-----------------|--|-----------------------------------------------------|
|                                                  |          |          |        |        |                    |           |                 |  | derivatives                                         |
| <b>3'-METHOXY-4',5,7-<br/>TRIHYDROXYFLAVONOL</b> | 9.096884 | 317.0655 | 222116 | 1.9    | [M+H] <sup>+</sup> | 317.06558 | C16H12O7        |  | Flavonols                                           |
| <b>(+)-Taxifolin</b>                             | 5.258417 | 305.1354 | 201960 | 3.9    | [M+H] <sup>+</sup> | 305.06558 | C15H12O7        |  | Flavanonols                                         |
| <b>L-5-Oxoproline</b>                            | 1.647283 | 130.0496 | 186844 | 0      | [M+H] <sup>+</sup> | 130.04987 | C5H7NO3         |  | Alpha amino acids and<br>derivatives                |
| <b>L-Valine</b>                                  | 1.2073   | 118.0861 | 177176 | 0.8    | [M+H] <sup>+</sup> | 118.08626 | C5H11NO2        |  | Valine and derivatives                              |
| <b>L-(-)-Phenylalanine</b>                       | 2.061083 | 166.0833 | 162887 | 12.3   | [M+H] <sup>+</sup> | 166.08626 | C9H11NO2        |  | Phenylalanine and<br>derivatives                    |
| <b>Malvidin-3-O-glucoside<br/>chloride</b>       | 7.82195  | 493.1365 | 155355 | -0.4   | [M] <sup>+</sup>   | 493.13351 | C23H25O12       |  | Anthocyanidin-3-O-<br>glycosides                    |
| <b>L-PROLINE</b>                                 | 1.155467 | 116.069  | 143491 | 9.8    | [M+H] <sup>+</sup> | 116.0706  | C5H9NO2         |  | Proline and derivatives                             |
| <b>Daphnetin</b>                                 | 7.945617 | 179.1109 | 107743 | -9.4   | [M+H] <sup>+</sup> | 179.03389 | C9H6O4          |  | 7,8-dihydroxycoumarins                              |
| <b>2'-Deoxyadenosine 5'-<br/>monophosphate</b>   | 1.416783 | 332.1106 | 103832 | -0.8   | [M+H] <sup>+</sup> | 332.07544 | C10H14N5O6<br>P |  | Purine 2'-<br>deoxyribonucleoside<br>monophosphates |
| <b>S-Adenosyl-L-<br/>homocysteine</b>            | 10.01483 | 385.282  | 97268  | -25.7  | [M+H] <sup>+</sup> | 385.12888 | C14H20N6O5S     |  | 5'-deoxy-5'-<br>thionucleosides                     |
| <b>Leupeptin hemisulfate<br/>salt</b>            | 21.78888 | 427.3107 | 94923  | 13.4   | [M+H] <sup>+</sup> | 427.30273 | C20H38N6O4      |  | Dipeptides                                          |
| <b>D-(-)-Erythrose</b>                           | 19.68733 | 121.0312 | 93365  | -13.6  | [M+H] <sup>+</sup> | 121.04954 | C4H8O4          |  | Pentoses                                            |
| <b>Histidinol</b>                                | 2.3579   | 142.1605 | 86176  | -6.6   | [M+H] <sup>+</sup> | 142.09749 | C6H11N3O        |  | Aralkylamines                                       |
| <b>Pipecolate</b>                                | 1.194133 | 130.1043 | 77334  | -100.6 | [M+H] <sup>+</sup> | 130.08626 | C6H11NO2        |  | Alpha amino acids                                   |
| <b>L-Glutamic acid</b>                           | 1.155467 | 148.0596 | 71180  | 0.7    | [M+H] <sup>+</sup> | 148.06044 | C5H9NO4         |  | Glutamic acid and<br>derivatives                    |
| <b>Xanthosine-5'-<br/>monophosphate</b>          | 10.74463 | 365.1946 | 69798  | -0.7   | [M+H] <sup>+</sup> | 365.04929 | C10H13N4O9<br>P |  | Purine ribonucleoside<br>monophosphates             |
| <b>Baicalein-7-O-<br/>glucuronide</b>            | 8.909567 | 447.092  | 66314  | 0.4    | [M+H] <sup>+</sup> | 447.09219 | C21H18O11       |  | Flavonoid-7-O-<br>glucuronides                      |
| <b>Amantadine</b>                                | 1.233633 | 152.0554 | 65059  | 13.9   | [M+H] <sup>+</sup> | 152.14337 | C10H17N         |  | Monoalkylamines                                     |
| <b>S-Adenosyl-L-</b>                             | 10.91645 | 399.1646 | 63754  | 1      | [M+H] <sup>+</sup> | 399.1445  | C15H22N6O5S     |  | 5'-deoxy-5'-                                        |

|                                                       |          |          |       |       |                    |           |            |                                             |
|-------------------------------------------------------|----------|----------|-------|-------|--------------------|-----------|------------|---------------------------------------------|
| <b>methionine</b>                                     |          |          |       |       |                    |           |            | thionucleosides                             |
| <b>N-Acetylneuraminat</b>                             | 2.04875  | 310.1284 | 62994 | -0.3  | [M+H] <sup>+</sup> | 310.11325 | C11H19NO9  | N-acylneuraminic acids                      |
| <b>NICOTINIC ACID</b>                                 | 26.83012 | 124.088  | 60233 | 0     | [M+H] <sup>+</sup> | 124.03931 | C6H5NO2    | Pyridinecarboxylic acids                    |
| <b>Caffeine</b>                                       | 15.3734  | 195.1351 | 59621 | 13.7  | [M+H] <sup>+</sup> | 195.08765 | C8H10N4O2  | Xanthines                                   |
| <b>Glycerol-2-phosphate</b>                           | 12.58503 | 173.0813 | 52992 | 0.4   | [M+H] <sup>+</sup> | 173.02095 | C3H9O6P    | Glycerophosphates                           |
| <b>3-FORMYLINDOLE</b>                                 | 8.1786   | 146.0563 | 48678 | 18.7  | [M+H] <sup>+</sup> | 146.06004 | C9H7NO     | Indoles                                     |
| <b>Cytidine</b>                                       | 1.1298   | 244.0885 | 48328 | 11.6  | [M+H] <sup>+</sup> | 244.0928  | C9H13N3O5  | Pyrimidine nucleosides                      |
| <b>Peonidin-3,5-O-di-beta-glucopyranoside</b>         | 7.29415  | 625.1793 | 43936 | -0.6  | [M] <sup>+</sup>   | 625.17578 | C28H33O16  | Anthocyanidin-5-O-glycosides                |
| <b>Ononin</b>                                         | 12.04923 | 431.1606 | 43353 | 14    | [M+H] <sup>+</sup> | 431.13367 | C22H22O9   | Isoflavonoid O-glycosides                   |
| <b>Piperazine</b>                                     | 1.065817 | 87.04267 | 41783 | 2.5   | [M+H] <sup>+</sup> | 87.09167  | C4H10N2    | Piperazines                                 |
| <b>UROCANIC ACID</b>                                  | 8.647233 | 139.1116 | 41696 | 0.4   | [M+H] <sup>+</sup> | 139.0502  | C6H6N2O2   | Imidazolyl carboxylic acids and derivatives |
| <b>(-)-RIBOFLAVIN</b>                                 | 11.32927 | 377.2278 | 40152 | 3.4   | [M+H] <sup>+</sup> | 377.14557 | C17H20N4O6 | Flavins                                     |
| <b>D-Glucosamine-6-phosphate</b>                      | 1.142467 | 260.0589 | 37767 | -7.5  | [M+H] <sup>+</sup> | 260.05298 | C6H14NO8P  | Hexose phosphates                           |
| <b>Resveratrol</b>                                    | 1.246967 | 229.1562 | 34568 | -1.9  | [M+H] <sup>+</sup> | 229.08592 | C14H12O3   | Stilbenes                                   |
| <b>PIPERIDINE</b>                                     | 1.053317 | 86.05891 | 32043 | -0.6  | [M+H] <sup>+</sup> | 86.09643  | C5H11N     | Piperidines                                 |
| <b>Quercetin-3-Arabinoside</b>                        | 11.17945 | 435.2083 | 31917 | -8.4  | [M+H] <sup>+</sup> | 435.09219 | C20H18O11  | Flavonoid-3-O-glycosides                    |
| <b>Luteolin-8-C-glucoside</b>                         | 12.18622 | 449.1789 | 28702 | -1.3  | [M+H] <sup>+</sup> | 449.10785 | C21H20O11  | Flavonoid 8-C-glycosides                    |
| <b>Adenine</b>                                        | 7.4168   | 136.0773 | 28654 | 0     | [M+H] <sup>+</sup> | 136.06177 | C5H5N5     | 6-aminopurines                              |
| <b>DL-Cystathionine</b>                               | 13.27617 | 223.1344 | 28309 | -1.2  | [M+H] <sup>+</sup> | 223.07471 | C7H14N2O4S | L-cysteine-S-conjugates                     |
| <b>Malvidin-3, 5-di-O-glucoside chloride</b>          | 21.14975 | 655.3069 | 27569 | 8.7   | [M] <sup>+</sup>   | 655.18634 | C29H35O17  | Anthocyanidin-5-O-glycosides                |
| <b>3-(4-HYDROXY-3-METHOXYPHENYL)PRO P-2-ENOICACID</b> | 1.592283 | 194.9686 | 26189 | -4.2  | [M+H] <sup>+</sup> | 195.06519 | C10H10O4   | Hydroxycinnamic acids                       |
| <b>Apigenin 8-C-glucoside</b>                         | 12.6967  | 433.1982 | 25978 | -21.2 | [M+H] <sup>+</sup> | 433.11292 | C21H20O10  | Flavonoid 8-C-glycosides                    |
| <b>CHOLIC ACID</b>                                    | 7.391967 | 409.186  | 25082 | 1     | [M+H] <sup>+</sup> | 409.29486 | C24H40O5   | Trihydroxy bile acids,                      |

|                                                     |          |          |       |       |                    |           |            |                                |
|-----------------------------------------------------|----------|----------|-------|-------|--------------------|-----------|------------|--------------------------------|
|                                                     |          |          |       |       |                    |           |            | alcohols and derivatives       |
| <b>Glycine-Betaine</b>                              | 26.80512 | 118.0856 | 24893 | 7     | [M+H] <sup>+</sup> | 118.08626 | C5H11NO2   | Alpha amino acids              |
| <b>Formononetin</b>                                 | 22.06138 | 269.0985 | 24469 | 6.3   | [M+H] <sup>+</sup> | 269.08084 | C16H12O4   | 4'-O-methylisoflavones         |
| <b>Histamine</b>                                    | 1.2073   | 112.0874 | 21528 | -3.2  | [M+H] <sup>+</sup> | 112.08692 | C5H9N3     | 2-arylethylamines              |
| <b>Isoguvacine</b>                                  | 21.37923 | 128.1057 | 19693 | 0.5   | [M+H] <sup>+</sup> | 128.0706  | C6H9NO2    | Hydropyridines                 |
| <b>Pyridoxamine</b>                                 | 17.85027 | 169.1206 | 19583 | 11.8  | [M+H] <sup>+</sup> | 169.09715 | C8H12N2O2  | Pyridoxamine 5'-phosphates     |
| <b>Gossypin</b>                                     | 4.9661   | 481.1261 | 15961 | 12.3  | [M+H] <sup>+</sup> | 481.09766 | C21H20O13  | Flavonoid-8-O-glycosides       |
| <b>2-(4-<br/>ISOBUTYLPHENYL)PROP<br/>IONIC ACID</b> | 11.22945 | 207.0997 | 14321 | 3.2   | [M+H] <sup>+</sup> | 207.13795 | C13H18O2   | Phenylpropanoic acids          |
| <b>3,4-<br/>DIMETHOXYCINNAMIC<br/>ACID</b>          | 14.97175 | 209.1185 | 12223 | 7.9   | [M+H] <sup>+</sup> | 209.08084 | C11H12O4   | Coumaric acids and derivatives |
| <b>HYPOXANTHINE</b>                                 | 18.17042 | 137.1332 | 11300 | -0.1  | [M+H] <sup>+</sup> | 137.04579 | C5H4N4O    | Hypoxanthines                  |
| <b>NICOTINAMIDE</b>                                 | 1.246967 | 123.0917 | 8499  | 1     | [M+H] <sup>+</sup> | 123.05529 | C6H6N2O    | Nicotinamides                  |
| <b>1,4-BENZOQUINONE</b>                             | 8.7224   | 109.1027 | 7965  | -11.4 | [M+H] <sup>+</sup> | 109.0284  | C6H4O2     | P-benzoquinones                |
| <b>Cytidine-3',5'-<br/>cyclicmonophosphate</b>      | 6.656183 | 306.2336 | 7005  | -7.8  | [M+H] <sup>+</sup> | 306.04855 | C9H12N3O7P | Pentose phosphates             |



**Table S4:** The list of metabolites detected in the *C. endivia* extract by UPLC/T-TOF-MS/MS spectrometer in the negative ionization mode.

| Title                                     | RT (min)      | Precursor (m/z) | Area     | Error (PPM) | Adduct | Reference (m/z) | Formula  | Ontology                                    |
|-------------------------------------------|---------------|-----------------|----------|-------------|--------|-----------------|----------|---------------------------------------------|
| <b><math>\gamma</math>-Linolenic acid</b> | 19.07118      | 277.2176        | 37943284 | -0.9        | [M-H]- | 277.21732       | C18H30O2 | Lineolic acids and derivatives              |
| <b>Gluconate</b>                          | 0.9558        | 195.0495        | 5327352  | 6           | [M-H]- | 195.05103       | C6H12O7  | Medium-chain hydroxy acids and derivatives  |
| <b>D-(-)-Quinic acid</b>                  | 0.930466<br>7 | 191.0543        | 3485385  | 7.4         | [M-H]- | 191.05611       | C7H12O6  | Quinic acids and derivatives                |
| <b>D-(+)-Malic acid</b>                   | 0.8793        | 133.0128        | 3334704  | 6.6         | [M-H]- | 133.01425       | C4H6O5   | Beta hydroxy acids and derivatives          |
| <b>MALEIC ACID</b>                        | 0.8793        | 115.0034        | 637716   | -0.6        | [M-H]- | 115.00368       | C4H4O4   | Dicarboxylic acids and derivatives          |
| <b>3-Phospho-D-glycerate</b>              | 5.189083      | 185.1162        | 584261   | 8           | [M-H]- | 184.98566       | C3H7O7P  | Sugar acids and derivatives                 |
| <b>SUCCINIC ACID</b>                      | 0.891966<br>6 | 117.0177        | 256807   | 6.5         | [M-H]- | 117.01933       | C4H6O4   | Dicarboxylic acids and derivatives          |
| <b>3,4-Dihydroxymandelate</b>             | 4.526767      | 183.1042        | 251793   | -6.7        | [M-H]- | 183.02989       | C8H8O5   | Catechols                                   |
| <b>CITRACONIC ACID</b>                    | 1.5926        | 128.9574        | 165623   | 10.1        | [M-H]- | 129.01933       | C5H6O4   | Methyl-branched fatty acids                 |
| <b>Glyceric acid</b>                      | 0.9558        | 105.0182        | 80810    | 3.9         | [M-H]- | 105.01933       | C3H6O4   | Sugar acids and derivatives                 |
| <b>BETA-INDOLEACETIC ACID</b>             | 7.079134      | 174.0574        | 36304    | -6.4        | [M-H]- | 174.05605       | C10H9NO2 | Indole-3-acetic acid derivatives            |
| <b>Lactic acid</b>                        | 0.8793        | 89.02464        | 35426    | -3.2        | [M-H]- | 89.02441        | C3H6O3   | Alpha hydroxy acids and derivatives         |
| <b>2-Isopropylmalic acid</b>              | 1.0318        | 175.0595        | 24760    | 4.2         | [M-H]- | 175.0612        | C7H12O5  | Hydroxy fatty acids                         |
| <b>UROCANIC ACID</b>                      | 1.13345       | 137.0233        | 21241    | 0.6         | [M-H]- | 137.03564       | C6H6N2O2 | Imidazolyl carboxylic acids and derivatives |
| <b>Gibberelin A3</b>                      | 6.071367      | 345.155         | 17337    | 0           | [M-H]- | 345.13437       | C19H22O6 | C19-gibberellin 6-                          |

carboxylic acids

|                                                      |          |          |         |      |         |           |              |                                   |
|------------------------------------------------------|----------|----------|---------|------|---------|-----------|--------------|-----------------------------------|
| <b>3-(4-HYDROXYPHENYL)PROP-2-ENOIC ACID</b>          | 1.225783 | 163.0344 | 6626    | 24.7 | [M-H]-  | 163.04007 | C9H8O3       | Hydroxycinnamic acids             |
| <b>L-beta-Homoisoleucine</b>                         | 8.039416 | 144.0447 | 602921  | 0.6  | [M-H]-  | 144.103   | C7H15NO2     | Beta amino acids and derivatives  |
| <b>trans-4-Hydroxy-L-proline</b>                     | 1.277117 | 130.0844 | 297606  | 13.2 | [M-H]-  | 130.05096 | C5H9NO3      | Proline and derivatives           |
| <b>L-5-Oxoproline</b>                                | 0.9683   | 128.0341 | 114097  | 0    | [M-H]-  | 128.03532 | C5H7NO3      | Alpha amino acids and derivatives |
| <b>5-AMINOVALERIC ACID</b>                           | 1.172283 | 116.0693 | 72930   | 12   | [M-H]-  | 116.0717  | C5H11NO2     | Delta amino acids and derivatives |
| <b>L-(-)-Phenylalanine</b>                           | 1.878417 | 164.0694 | 57012   | 8.2  | [M-H]-  | 164.0717  | C9H11NO2     | Phenylalanine and derivatives     |
| <b>L-Glutamic acid</b>                               | 0.942966 | 146.0447 | 52690   | 1.8  | [M-H]-  | 146.04588 | C5H9NO4      | Glutamic acid and derivatives     |
| <b>L-(-)-Threonine</b>                               | 1.121117 | 118.0477 | 15209   | 17.1 | [M-H]-  | 118.05096 | C4H9NO3      | L-alpha-amino acids               |
| <b>Esculin</b>                                       | 15.84418 | 339.201  | 203112  | -1.5 | [M-H]-  | 339.07214 | C15H16O9     | Coumarin glycosides               |
| <b>Galactinol Dihydrate</b>                          | 1.09545  | 341.1078 | 65945   | 0.4  | [M-H]-  | 341.10895 | C12H22O11    | O-glycosyl compounds              |
| <b>4-Methylsulfinylbutyl glucosinolate</b>           | 11.63257 | 436.1941 | 19156   | 6    | [M-H]-  | 436.04114 | C12H23NO10S3 | Alkylglucosinolates               |
| <b>E-3,4,5'-Trihydroxy-3'-glucopyranosylstilbene</b> | 8.495566 | 405.1167 | 12901   | 6.5  | [M-H]-  | 405.11911 | C20H22O9     | Stilbene glycosides               |
| <b>Apigenin</b>                                      | 10.39897 | 269.0444 | 5452233 | 3.3  | [M-H]-  | 269.04553 | C15H10O5     | Flavones                          |
| <b>Peonidine-3-O-glucoside chloride</b>              | 7.38995  | 461.1098 | 1011160 | -0.8 | [M-2H]- | 461.1084  | C22H23O11    | Anthocyanidin-3-O-glycosides      |
| <b>3 5 7-trihydroxy-4'-methoxyflavone</b>            | 9.94305  | 299.0498 | 658367  | 20.5 | [M-H]-  | 299.05612 | C16H12O6     | Flavonols                         |
| <b>Petunidin-3-O-β-glucopyranoside</b>               | 7.079134 | 477.1029 | 634073  | 1.3  | [M-2H]- | 477.1033  | C22H23O12    | Anthocyanidin-3-O-glycosides      |
| <b>Isorhamnetin-3-O-</b>                             | 8.882717 | 477.1037 | 394143  | -0.3 | [M-H]-  | 477.10385 | C22H22O12    | Flavonoid-3-O-glycosides          |

|                                                                           |               |          |        |      |         |           |             |                                                  |  |
|---------------------------------------------------------------------------|---------------|----------|--------|------|---------|-----------|-------------|--------------------------------------------------|--|
| <b>glucoside</b>                                                          |               |          |        |      |         |           |             |                                                  |  |
| <b>3'-METHOXY-4',5,7-TRIHYDROXYFLAVONOL</b>                               | 9.035033      | 315.05   | 280182 | 1.8  | [M-H]-  | 315.05103 | C16H12O7    | Flavonols                                        |  |
| <b>Baicalein-7-O-glucuronide</b>                                          | 5.722217      | 445.078  | 220866 | 0.4  | [M-H]-  | 445.07764 | C21H18O11   | Flavonoid-7-O-glucuronides                       |  |
| <b>Kaempferol-3-O-alpha-L-rhamnoside</b>                                  | 0.942966<br>6 | 431.0771 | 114237 | 0.7  | [M-H]-  | 431.09836 | C21H20O10   | Flavonoid-3-O-glycosides                         |  |
| <b>Isorhamnetin-3-O-rutinoside</b>                                        | 7.129967      | 623.1536 | 62631  | 11.9 | [M-H]-  | 623.16174 | C28H32O16   | Flavonoid-3-O-glycosides                         |  |
| <b>Quercitrin</b>                                                         | 1.198283      | 447.1186 | 42538  | -8   | [M-H]-  | 447.09329 | C21H20O11   | Flavonoid-3-O-glycosides                         |  |
| <b>Delphinidin-3-O-(6''-O-alpha-rhamnopyranosyl-beta-glucopyranoside)</b> | 6.308517      | 609.1357 | 24937  | 15.7 | [M-2H]- | 609.14557 | C27H31O16   | Anthocyanidin-3-O-glycosides                     |  |
| <b>eriodictyol-7-O-glucoside</b>                                          | 0.930466<br>7 | 449.0646 | 22343  | 1.1  | [M-H]-  | 449.10895 | C21H22O11   | Flavonoid-7-O-glycosides                         |  |
| <b>Daidzein-8-C-glucoside</b>                                             | 5.453233      | 415.1634 | 15651  | -5.4 | [M-H]-  | 415.10345 | C21H20O9    | Isoflavonoid C-glycosides                        |  |
| <b>Acacetin-7-O-rutinoside</b>                                            | 0.9558        | 590.9988 | 12970  | 4    | [M-H]-  | 591.17194 | C28H32O14   | Flavonoid-7-O-glycosides                         |  |
| <b>Rhoifolin</b>                                                          | 8.596566      | 577.1898 | 11024  | 0.7  | [M-H]-  | 577.15625 | C27H30O14   | Flavonoid-7-O-glycosides                         |  |
| <b>Uridine</b>                                                            | 1.225783      | 243.0622 | 498791 | -0.5 | [M-H]-  | 243.06226 | C9H12N2O6   | Pyrimidine nucleosides                           |  |
| <b>2'-Deoxyinosine 5'-monophosphate</b>                                   | 10.09732      | 330.9835 | 203250 | -9.8 | [M-H]-  | 331.04492 | C10H13N4O7P | Purine 2'-deoxyribonucleoside monophosphates     |  |
| <b>2'-Deoxyuridine-5'-monophosphate</b>                                   | 6.5295        | 307.1383 | 159510 | 4.5  | [M-H]-  | 307.03366 | C9H13N2O8P  | Pyrimidine 2'-deoxyribonucleoside monophosphates |  |
| <b>Guanosine</b>                                                          | 1.225783      | 282.0826 | 103115 | 4.7  | [M-H]-  | 282.08438 | C10H13N5O5  | Purine nucleosides                               |  |
| <b>Inosine-5'-monophosphate</b>                                           | 4.564267      | 347.1699 | 97226  | -0.1 | [M-H]-  | 347.03983 | C10H13N4O8P | Purine ribonucleoside monophosphates             |  |
| <b>2'-Deoxyuridine</b>                                                    | 18.69637      | 227.2016 | 87980  | -1   | [M-H]-  | 227.06735 | C9H12N2O5   | Pyrimidine 2'-                                   |  |

|                                                                        |          |          |        |       |        |           |                |                                                   |
|------------------------------------------------------------------------|----------|----------|--------|-------|--------|-----------|----------------|---------------------------------------------------|
|                                                                        |          |          |        |       |        |           |                | deoxyribonucleosides                              |
| <b>Adenine</b>                                                         | 1.4091   | 134.0461 | 83209  | 0.9   | [M-H]- | 134.04723 | C5H5N5         | 6-aminopurines                                    |
| <b>5-Aminoimidazole-4-carboxamide-1-ribofuranosyl 5'-monophosphate</b> | 15.9815  | 337.2069 | 54558  | -1.9  | [M-H]- | 337.05548 | C9H15N4O8<br>P | 1-ribosyl-<br>imidazolecarboxamides               |
| <b>Thymidine</b>                                                       | 7.7971   | 241.1083 | 22253  | -0.1  | [M-H]- | 241.08299 | C10H14N2O<br>5 | Pyrimidine 2'-<br>deoxyribonucleosides            |
| <b>Inosine</b>                                                         | 1.225783 | 267.0903 | 22131  | -28.1 | [M-H]- | 267.07349 | C10H12N4O<br>5 | Purine nucleosides                                |
| <b>Isopentenyladenine</b>                                              | 10.19798 | 202.0499 | 10938  | 1.1   | [M-H]- | 202.10982 | C10H13N5       | 6-alkylaminopurines                               |
| <b>Sodium Deoxycholate</b>                                             | 5.684216 | 391.1569 | 159076 | 8.3   | [M-H]- | 391.28537 | C24H40O4       | Dihydroxy bile acids,<br>alcohols and derivatives |
| <b>Mucate</b>                                                          | 9.29685  | 209.1147 | 61892  | 11.7  | [M-H]- | 209.03029 | C6H10O8        | Glucuronic acid<br>derivatives                    |
| <b>Xanthine</b>                                                        | 8.520733 | 151.0411 | 61529  | -1.2  | [M-H]- | 151.02615 | C5H4N4O2       | Xanthines                                         |
| <b>1-Myristoyl-2-hydroxy-sn-glycero-3-phosphate</b>                    | 16.44898 | 381.2278 | 34340  | 7     | [M-H]- | 381.20477 | C17H35O7P      | 1-acylglycerol-3-<br>phosphates                   |
| <b>GAMMA-TERPINENE</b>                                                 | 6.5295   | 135.0434 | 32088  | 2.1   | [M-H]- | 135.11792 | C10H16         | Branched unsaturated<br>hydrocarbons              |
| <b>L-Homocarnosine</b>                                                 | 9.772833 | 239.0674 | 25767  | 0     | [M-H]- | 239.11496 | C10H16N4O<br>3 | Hybrid peptides                                   |

**Table S5:** The interaction scores of the protein-protein interaction network for the investigated genes involved in the inflammatory pathway.

| <b>node1</b> | <b>node2</b> | <b>node1 accession</b> | <b>node2 accession</b> | <b>node1 annotation</b>                                                                                                                                                                                                                                                                                                                                                                                                                                                                                                                                                                                                       | <b>node2 annotation</b>                                                                                                                                                                                                                                                                                                                                                                                                                                                                                                                                                                                                       | <b>score</b> |
|--------------|--------------|------------------------|------------------------|-------------------------------------------------------------------------------------------------------------------------------------------------------------------------------------------------------------------------------------------------------------------------------------------------------------------------------------------------------------------------------------------------------------------------------------------------------------------------------------------------------------------------------------------------------------------------------------------------------------------------------|-------------------------------------------------------------------------------------------------------------------------------------------------------------------------------------------------------------------------------------------------------------------------------------------------------------------------------------------------------------------------------------------------------------------------------------------------------------------------------------------------------------------------------------------------------------------------------------------------------------------------------|--------------|
| <b>IL1B</b>  | IL6          | ENSP00000263341        | ENSP00000385675        | <i>Interleukin-1 beta; Potent proinflammatory cytokine. Initially discovered as the major endogenous pyrogen, induces prostaglandin synthesis, neutrophil influx and activation, T-cell activation and cytokine production, B- cell activation and antibody production, and fibroblast proliferation and collagen production. Promotes Th17 differentiation of T-cells. Synergizes with IL12/interleukin-12 to induce IFNG synthesis from T- helper 1 (Th1) cells.</i>                                                                                                                                                        | <i>Interleukin-6; Cytokine with a wide variety of biological functions. It is a potent inducer of the acute phase response. Plays an essential role in the final differentiation of B-cells into Ig-secreting cells involved in lymphocyte and monocyte differentiation. Acts on B-cells, T-cells, hepatocytes, hematopoietic progenitor cells and cells of the CNS. Required for the generation of T(H)17 cells. Also acts as a myokine. It is discharged into the bloodstream after muscle contraction and acts to increase the breakdown of fats and to improve insulin resistance. It induces myeloma and plasm [...]</i> | 0.996        |
| <b>IL1B</b>  | PTGS2        | ENSP00000263341        | ENSP00000356438        | <i>Interleukin-1 beta; Potent proinflammatory cytokine. Initially discovered as the major endogenous pyrogen, induces prostaglandin synthesis, neutrophil influx and activation, T-cell activation and cytokine production, B- cell activation and antibody production, and fibroblast proliferation and collagen production. Promotes Th17 differentiation of T-cells. Synergizes with IL12/interleukin-12 to induce IFNG synthesis from T- helper 1 (Th1) cells.</i>                                                                                                                                                        | <i>Prostaglandin G/H synthase 2; Converts arachidonate to prostaglandin H2 (PGH2), a committed step in prostanoid synthesis. Constitutively expressed in some tissues in physiological conditions, such as the endothelium, kidney and brain, and in pathological conditions, such as in cancer. PTGS2 is responsible for production of inflammatory prostaglandins. Up-regulation of PTGS2 is also associated with increased cell adhesion, phenotypic changes, resistance to apoptosis and tumor angiogenesis. In cancer cells, PTGS2 is a key step in the production of prostaglandin E2 (PGE2), which plays imp [...]</i> | 0.974        |
| <b>IL1B</b>  | TNF          | ENSP00000263341        | ENSP00000398698        | <i>Interleukin-1 beta; Potent proinflammatory cytokine. Initially discovered as the major endogenous pyrogen, induces prostaglandin synthesis, neutrophil influx and activation, T-cell activation and cytokine production, B- cell activation and antibody production, and fibroblast proliferation and collagen production. Promotes Th17 differentiation of T-cells. Synergizes with IL12/interleukin-12 to induce IFNG synthesis from T- helper 1 (Th1) cells.</i>                                                                                                                                                        | <i>Tumor necrosis factor, membrane form; Cytokine that binds to TNFRSF1A/TNFR1 and TNFRSF1B/TNFR. It is mainly secreted by macrophages and can induce cell death of certain tumor cell lines. It is potent pyrogen causing fever by direct action or by stimulation of interleukin-1 secretion and is implicated in the induction of cachexia. Under certain conditions it can stimulate cell proliferation and induce cell differentiation. Impairs regulatory T- cells (Treg) function in individuals with rheumatoid arthritis via FOXP3 dephosphorylation. Upregulates the expression of protein phosphatase 1 [...]</i>  | 0.998        |
| <b>IL6</b>   | IL1B         | ENSP00000385675        | ENSP00000263341        | <i>Interleukin-6; Cytokine with a wide variety of biological functions. It is a potent inducer of the acute phase response. Plays an essential role in the final differentiation of B-cells into Ig-secreting cells involved in lymphocyte and monocyte differentiation. Acts on B-cells, T-cells, hepatocytes, hematopoietic progenitor cells and cells of the CNS. Required for the generation of T(H)17 cells. Also acts as a myokine. It is discharged into the bloodstream after muscle contraction and acts to increase the breakdown of fats and to improve insulin resistance. It induces myeloma and plasm [...]</i> | <i>Interleukin-1 beta; Potent proinflammatory cytokine. Initially discovered as the major endogenous pyrogen, induces prostaglandin synthesis, neutrophil influx and activation, T-cell activation and cytokine production, B- cell activation and antibody production, and fibroblast proliferation and collagen production. Promotes Th17 differentiation of T-cells. Synergizes with IL12/interleukin-12 to induce IFNG synthesis from T- helper 1 (Th1) cells.</i>                                                                                                                                                        | 0.996        |
| <b>IL6</b>   | PTGS2        | ENSP00000385675        | ENSP00000356438        | <i>Interleukin-6; Cytokine with a wide variety of biological functions. It is a potent inducer of the acute phase response. Plays an essential role in the final differentiation of B-cells into Ig-secreting cells involved in lymphocyte and monocyte differentiation. Acts on B-cells, T-cells, hepatocytes, hematopoietic progenitor cells and cells of the CNS. Required for the generation of T(H)17 cells. Also acts as a myokine. It is discharged into the bloodstream after muscle contraction and acts to increase the breakdown of fats and to improve insulin resistance. It induces myeloma and plasm [...]</i> | <i>Prostaglandin G/H synthase 2; Converts arachidonate to prostaglandin H2 (PGH2), a committed step in prostanoid synthesis. Constitutively expressed in some tissues in physiological conditions, such as the endothelium, kidney and brain, and in pathological conditions, such as in cancer. PTGS2 is responsible for production of inflammatory prostaglandins. Up-regulation of PTGS2 is also associated with increased cell adhesion, phenotypic changes, resistance to apoptosis and tumor angiogenesis. In cancer cells, PTGS2 is a key step in the production of prostaglandin E2 (PGE2), which plays imp [...]</i> | 0.96         |
| <b>IL6</b>   | TNF          | ENSP00000385675        | ENSP00000398698        | <i>Interleukin-6; Cytokine with a wide variety of biological functions. It is a potent inducer of the acute phase response. Plays an essential role in the final differentiation of B-cells into Ig-secreting cells involved in lymphocyte and monocyte differentiation. Acts on B-cells, T-cells, hepatocytes, hematopoietic progenitor cells and cells of the CNS. Required for the generation of T(H)17 cells. Also acts as a myokine. It is discharged into the bloodstream after muscle contraction and acts to increase the breakdown of fats and to improve insulin resistance. It induces myeloma and plasm [...]</i> | <i>Tumor necrosis factor, membrane form; Cytokine that binds to TNFRSF1A/TNFR1 and TNFRSF1B/TNFR. It is mainly secreted by macrophages and can induce cell death of certain tumor cell lines. It is potent pyrogen causing fever by direct action or by stimulation of interleukin-1 secretion and is implicated in the induction of cachexia. Under certain conditions it can stimulate cell proliferation and induce cell differentiation. Impairs regulatory T- cells (Treg) function in individuals with rheumatoid arthritis via FOXP3 dephosphorylation. Upregulates the expression of protein phosphatase 1 [...]</i>  | 0.994        |
| <b>PTGS2</b> | IL1B         | ENSP00000356438        | ENSP00000263341        | <i>Prostaglandin G/H synthase 2; Converts arachidonate to prostaglandin H2 (PGH2), a committed step in prostanoid synthesis. Constitutively expressed in some tissues in physiological conditions, such as the endothelium, kidney and brain, and in pathological conditions, such as in cancer. PTGS2 is responsible for production of inflammatory prostaglandins. Up-regulation of PTGS2 is also associated with increased cell adhesion, phenotypic changes, resistance to apoptosis and tumor angiogenesis. In cancer cells, PTGS2 is a key step in the production of prostaglandin E2 (PGE2),</i>                       | <i>Interleukin-1 beta; Potent proinflammatory cytokine. Initially discovered as the major endogenous pyrogen, induces prostaglandin synthesis, neutrophil influx and activation, T-cell activation and cytokine production, B- cell activation and antibody production, and fibroblast proliferation and collagen production. Promotes Th17 differentiation of T-cells. Synergizes with IL12/interleukin-12 to induce IFNG synthesis from T- helper 1 (Th1) cells.</i>                                                                                                                                                        | 0.974        |

|              |              |                 |                 |                                                                                                                                                                                                                                                                                                                                                                                                                                                                                                                                                                                                                        |                                                                                                                                                                                                                                                                                                                                                                                                                                                                                                                                                                                                                        |              |
|--------------|--------------|-----------------|-----------------|------------------------------------------------------------------------------------------------------------------------------------------------------------------------------------------------------------------------------------------------------------------------------------------------------------------------------------------------------------------------------------------------------------------------------------------------------------------------------------------------------------------------------------------------------------------------------------------------------------------------|------------------------------------------------------------------------------------------------------------------------------------------------------------------------------------------------------------------------------------------------------------------------------------------------------------------------------------------------------------------------------------------------------------------------------------------------------------------------------------------------------------------------------------------------------------------------------------------------------------------------|--------------|
|              |              |                 |                 | <i>which plays imp [...]</i>                                                                                                                                                                                                                                                                                                                                                                                                                                                                                                                                                                                           |                                                                                                                                                                                                                                                                                                                                                                                                                                                                                                                                                                                                                        |              |
| <b>PTGS2</b> | <b>IL6</b>   | ENSP00000356438 | ENSP00000385675 | Prostaglandin G/H synthase 2; Converts arachidonate to prostaglandin H2 (PGH2), a committed step in prostanoid synthesis. Constitutively expressed in some tissues in physiological conditions, such as the endothelium, kidney and brain, and in pathological conditions, such as in cancer. PTGS2 is responsible for production of inflammatory prostaglandins. Up-regulation of PTGS2 is also associated with increased cell adhesion, phenotypic changes, resistance to apoptosis and tumor angiogenesis. In cancer cells, PTGS2 is a key step in the production of prostaglandin E2 (PGE2), which plays imp [...] | Interleukin-6; Cytokine with a wide variety of biological functions. It is a potent inducer of the acute phase response. Plays an essential role in the final differentiation of B-cells into Ig-secreting cells Involved in lymphocyte and monocyte differentiation. Acts on B-cells, T-cells, hepatocytes, hematopoietic progenitor cells and cells of the CNS. Required for the generation of T(H)17 cells. Also acts as a myokine. It is discharged into the bloodstream after muscle contraction and acts to increase the breakdown of fats and to improve insulin resistance. It induces myeloma and plasm [...] | <u>0.96</u>  |
| <b>PTGS2</b> | <b>TNF</b>   | ENSP00000356438 | ENSP00000398698 | Prostaglandin G/H synthase 2; Converts arachidonate to prostaglandin H2 (PGH2), a committed step in prostanoid synthesis. Constitutively expressed in some tissues in physiological conditions, such as the endothelium, kidney and brain, and in pathological conditions, such as in cancer. PTGS2 is responsible for production of inflammatory prostaglandins. Up-regulation of PTGS2 is also associated with increased cell adhesion, phenotypic changes, resistance to apoptosis and tumor angiogenesis. In cancer cells, PTGS2 is a key step in the production of prostaglandin E2 (PGE2), which plays imp [...] | Tumor necrosis factor, membrane form; Cytokine that binds to TNFRSF1A/TNFR1 and TNFRSF1B/TNFB. It is mainly secreted by macrophages and can induce cell death of certain tumor cell lines. It is potent pyrogen causing fever by direct action or by stimulation of interleukin-1 secretion and is implicated in the induction of cachexia. Under certain conditions it can stimulate cell proliferation and induce cell differentiation. Impairs regulatory T-cells (Treg) function in individuals with rheumatoid arthritis via FOXP3 dephosphorylation. Upregulates the expression of protein phosphatase 1 [...]   | <u>0.916</u> |
| <b>TNF</b>   | <b>IL1B</b>  | ENSP00000398698 | ENSP00000263341 | Tumor necrosis factor, membrane form; Cytokine that binds to TNFRSF1A/TNFR1 and TNFRSF1B/TNFB. It is mainly secreted by macrophages and can induce cell death of certain tumor cell lines. It is potent pyrogen causing fever by direct action or by stimulation of interleukin-1 secretion and is implicated in the induction of cachexia. Under certain conditions it can stimulate cell proliferation and induce cell differentiation. Impairs regulatory T-cells (Treg) function in individuals with rheumatoid arthritis via FOXP3 dephosphorylation. Upregulates the expression of protein phosphatase 1 [...]   | Interleukin-1 beta; Potent proinflammatory cytokine. Initially discovered as the major endogenous pyrogen, induces prostaglandin synthesis, neutrophil influx and activation, T-cell activation and cytokine production, B- cell activation and antibody production, and fibroblast proliferation and collagen production. Promotes Th17 differentiation of T-cells. Synergizes with IL12/interleukin-12 to induce IFNG synthesis from T- helper 1 (Th1) cells.                                                                                                                                                        | <u>0.998</u> |
| <b>TNF</b>   | <b>IL6</b>   | ENSP00000398698 | ENSP00000385675 | Tumor necrosis factor, membrane form; Cytokine that binds to TNFRSF1A/TNFR1 and TNFRSF1B/TNFB. It is mainly secreted by macrophages and can induce cell death of certain tumor cell lines. It is potent pyrogen causing fever by direct action or by stimulation of interleukin-1 secretion and is implicated in the induction of cachexia. Under certain conditions it can stimulate cell proliferation and induce cell differentiation. Impairs regulatory T-cells (Treg) function in individuals with rheumatoid arthritis via FOXP3 dephosphorylation. Upregulates the expression of protein phosphatase 1 [...]   | Interleukin-6; Cytokine with a wide variety of biological functions. It is a potent inducer of the acute phase response. Plays an essential role in the final differentiation of B-cells into Ig-secreting cells Involved in lymphocyte and monocyte differentiation. Acts on B-cells, T-cells, hepatocytes, hematopoietic progenitor cells and cells of the CNS. Required for the generation of T(H)17 cells. Also acts as a myokine. It is discharged into the bloodstream after muscle contraction and acts to increase the breakdown of fats and to improve insulin resistance. It induces myeloma and plasm [...] | <u>0.994</u> |
| <b>TNF</b>   | <b>PTGS2</b> | ENSP00000398698 | ENSP00000356438 | Tumor necrosis factor, membrane form; Cytokine that binds to TNFRSF1A/TNFR1 and TNFRSF1B/TNFB. It is mainly secreted by macrophages and can induce cell death of certain tumor cell lines. It is potent pyrogen causing fever by direct action or by stimulation of interleukin-1 secretion and is implicated in the induction of cachexia. Under certain conditions it can stimulate cell proliferation and induce cell differentiation. Impairs regulatory T-cells (Treg) function in individuals with rheumatoid arthritis via FOXP3 dephosphorylation. Upregulates the expression of protein phosphatase 1 [...]   | Prostaglandin G/H synthase 2; Converts arachidonate to prostaglandin H2 (PGH2), a committed step in prostanoid synthesis. Constitutively expressed in some tissues in physiological conditions, such as the endothelium, kidney and brain, and in pathological conditions, such as in cancer. PTGS2 is responsible for production of inflammatory prostaglandins. Up-regulation of PTGS2 is also associated with increased cell adhesion, phenotypic changes, resistance to apoptosis and tumor angiogenesis. In cancer cells, PTGS2 is a key step in the production of prostaglandin E2 (PGE2), which plays imp [...] | <u>0.916</u> |

**Table S5:** The interaction scores of the protein-protein interaction network for the investigated genes involved in apoptotic pathway.

| node1 | node2 | node1 accession | node2 accession | node1 annotation                                                                                                                                                                                                                                                                                                                                                                                                                                                                                                                                                        | node2 annotation                                                                                                                                                                                                                                                                                                                                                                                                                                                                                                                                                                                                       | score |
|-------|-------|-----------------|-----------------|-------------------------------------------------------------------------------------------------------------------------------------------------------------------------------------------------------------------------------------------------------------------------------------------------------------------------------------------------------------------------------------------------------------------------------------------------------------------------------------------------------------------------------------------------------------------------|------------------------------------------------------------------------------------------------------------------------------------------------------------------------------------------------------------------------------------------------------------------------------------------------------------------------------------------------------------------------------------------------------------------------------------------------------------------------------------------------------------------------------------------------------------------------------------------------------------------------|-------|
| BAX   | BCL2  | ENSP00000293288 | ENSP00000381185 | Apoptosis regulator BAX; Plays a role in the mitochondrial apoptotic process. Under normal conditions, BAX is largely cytosolic via constant retrotranslocation from mitochondria to the cytosol mediated by BCL2L1/Bcl-xL, which avoids accumulation of toxic BAX levels at the mitochondrial outer membrane (MOM). Under stress conditions, undergoes a conformation change that causes translocation to the mitochondrion membrane, leading to the release of cytochrome c that then triggers apoptosis. Promotes activation of CASP3, and thereby apoptosis.        | Apoptosis regulator Bcl-2; Suppresses apoptosis in a variety of cell systems including factor-dependent lymphohematopoietic and neural cells. Regulates cell death by controlling the mitochondrial membrane permeability. Appears to function in a feedback loop system with caspases. Inhibits caspase activity either by preventing the release of cytochrome c from the mitochondria and/or by binding to the apoptosis-activating factor (APAF-1). May attenuate inflammation by impairing NLRP1-inflammasome activation, hence CASP1 activation and IL1B release.                                                | 0.999 |
| BAX   | CASP3 | ENSP00000293288 | ENSP00000311032 | Apoptosis regulator BAX; Plays a role in the mitochondrial apoptotic process. Under normal conditions, BAX is largely cytosolic via constant retrotranslocation from mitochondria to the cytosol mediated by BCL2L1/Bcl-xL, which avoids accumulation of toxic BAX levels at the mitochondrial outer membrane (MOM). Under stress conditions, undergoes a conformation change that causes translocation to the mitochondrion membrane, leading to the release of cytochrome c that then triggers apoptosis. Promotes activation of CASP3, and thereby apoptosis.        | Caspase-3 subunit p12; Involved in the activation cascade of caspases responsible for apoptosis execution. At the onset of apoptosis it proteolytically cleaves poly(ADP-ribose) polymerase (PARP) at a '216-Asp- -Gly-217' bond. Cleaves and activates sterol regulatory element binding proteins (SREBPs) between the basic helix-loop-helix leucine zipper domain and the membrane attachment domain. Cleaves and activates caspase-6, -7 and -9. Involved in the cleavage of huntingtin. Triggers cell adhesion in sympathetic neurons through RET cleavage.                                                       | 0.884 |
| BAX   | CYCS  | ENSP00000293288 | ENSP00000307786 | Apoptosis regulator BAX; Plays a role in the mitochondrial apoptotic process. Under normal conditions, BAX is largely cytosolic via constant retrotranslocation from mitochondria to the cytosol mediated by BCL2L1/Bcl-xL, which avoids accumulation of toxic BAX levels at the mitochondrial outer membrane (MOM). Under stress conditions, undergoes a conformation change that causes translocation to the mitochondrion membrane, leading to the release of cytochrome c that then triggers apoptosis. Promotes activation of CASP3, and thereby apoptosis.        | Cytochrome c; Electron carrier protein. The oxidized form of the cytochrome c heme group can accept an electron from the heme group of the cytochrome c1 subunit of cytochrome reductase. Cytochrome c then transfers this electron to the cytochrome oxidase complex, the final protein carrier in the mitochondrial electron-transport chain.                                                                                                                                                                                                                                                                        | 0.993 |
| BAX   | TP53  | ENSP00000293288 | ENSP00000269305 | Apoptosis regulator BAX; Plays a role in the mitochondrial apoptotic process. Under normal conditions, BAX is largely cytosolic via constant retrotranslocation from mitochondria to the cytosol mediated by BCL2L1/Bcl-xL, which avoids accumulation of toxic BAX levels at the mitochondrial outer membrane (MOM). Under stress conditions, undergoes a conformation change that causes translocation to the mitochondrion membrane, leading to the release of cytochrome c that then triggers apoptosis. Promotes activation of CASP3, and thereby apoptosis.        | Cellular tumor antigen p53; Acts as a tumor suppressor in many tumor types; induces growth arrest or apoptosis depending on the physiological circumstances and cell type. Involved in cell cycle regulation as a trans-activator that acts to negatively regulate cell division by controlling a set of genes required for this process. One of the activated genes is an inhibitor of cyclin-dependent kinases. Apoptosis induction seems to be mediated either by stimulation of BAX and FAS antigen expression, or by repression of Bcl-2 expression. Its pro-apoptotic activity is activated via its intera [...] | 0.994 |
| BCL2  | BAX   | ENSP00000381185 | ENSP00000293288 | Apoptosis regulator Bcl-2; Suppresses apoptosis in a variety of cell systems including factor-dependent lymphohematopoietic and neural cells. Regulates cell death by controlling the mitochondrial membrane permeability. Appears to function in a feedback loop system with caspases. Inhibits caspase activity either by preventing the release of cytochrome c from the mitochondria and/or by binding to the apoptosis-activating factor (APAF-1). May attenuate inflammation by impairing NLRP1-inflammasome activation, hence CASP1 activation and IL1B release. | Apoptosis regulator BAX; Plays a role in the mitochondrial apoptotic process. Under normal conditions, BAX is largely cytosolic via constant retrotranslocation from mitochondria to the cytosol mediated by BCL2L1/Bcl-xL, which avoids accumulation of toxic BAX levels at the mitochondrial outer membrane (MOM). Under stress conditions, undergoes a conformation change that causes translocation to the mitochondrion membrane, leading to the release of cytochrome c that then triggers apoptosis. Promotes activation of CASP3, and thereby apoptosis.                                                       | 0.999 |

|              |       |                 |                 |                                                                                                                                                                                                                                                                                                                                                                                                                                                                                                                                                                         |                                                                                                                                                                                                                                                                                                                                                                                                                                                                                                                                                                                                                        |       |
|--------------|-------|-----------------|-----------------|-------------------------------------------------------------------------------------------------------------------------------------------------------------------------------------------------------------------------------------------------------------------------------------------------------------------------------------------------------------------------------------------------------------------------------------------------------------------------------------------------------------------------------------------------------------------------|------------------------------------------------------------------------------------------------------------------------------------------------------------------------------------------------------------------------------------------------------------------------------------------------------------------------------------------------------------------------------------------------------------------------------------------------------------------------------------------------------------------------------------------------------------------------------------------------------------------------|-------|
| <b>BCL2</b>  | CASP3 | ENSP00000381185 | ENSP00000311032 | Apoptosis regulator Bcl-2; Suppresses apoptosis in a variety of cell systems including factor-dependent lymphohematopoietic and neural cells. Regulates cell death by controlling the mitochondrial membrane permeability. Appears to function in a feedback loop system with caspases. Inhibits caspase activity either by preventing the release of cytochrome c from the mitochondria and/or by binding to the apoptosis-activating factor (APAF-1). May attenuate inflammation by impairing NLRP1-inflammasome activation, hence CASP1 activation and IL1B release. | Caspase-3 subunit p12; Involved in the activation cascade of caspases responsible for apoptosis execution. At the onset of apoptosis it proteolytically cleaves poly(ADP-ribose) polymerase (PARP) at a '216-Asp- -Gly-217' bond. Cleaves and activates sterol regulatory element binding proteins (SREBPs) between the basic helix-loop-helix leucine zipper domain and the membrane attachment domain. Cleaves and activates caspase-6, -7 and -9. Involved in the cleavage of huntingtin. Triggers cell adhesion in sympathetic neurons through RET cleavage.                                                       | 0.987 |
| <b>BCL2</b>  | CYCS  | ENSP00000381185 | ENSP00000307786 | Apoptosis regulator Bcl-2; Suppresses apoptosis in a variety of cell systems including factor-dependent lymphohematopoietic and neural cells. Regulates cell death by controlling the mitochondrial membrane permeability. Appears to function in a feedback loop system with caspases. Inhibits caspase activity either by preventing the release of cytochrome c from the mitochondria and/or by binding to the apoptosis-activating factor (APAF-1). May attenuate inflammation by impairing NLRP1-inflammasome activation, hence CASP1 activation and IL1B release. | Cytochrome c; Electron carrier protein. The oxidized form of the cytochrome c heme group can accept an electron from the heme group of the cytochrome c1 subunit of cytochrome reductase. Cytochrome c then transfers this electron to the cytochrome oxidase complex, the final protein carrier in the mitochondrial electron-transport chain.                                                                                                                                                                                                                                                                        | 0.997 |
| <b>BCL2</b>  | TP53  | ENSP00000381185 | ENSP00000269305 | Apoptosis regulator Bcl-2; Suppresses apoptosis in a variety of cell systems including factor-dependent lymphohematopoietic and neural cells. Regulates cell death by controlling the mitochondrial membrane permeability. Appears to function in a feedback loop system with caspases. Inhibits caspase activity either by preventing the release of cytochrome c from the mitochondria and/or by binding to the apoptosis-activating factor (APAF-1). May attenuate inflammation by impairing NLRP1-inflammasome activation, hence CASP1 activation and IL1B release. | Cellular tumor antigen p53; Acts as a tumor suppressor in many tumor types; induces growth arrest or apoptosis depending on the physiological circumstances and cell type. Involved in cell cycle regulation as a trans-activator that acts to negatively regulate cell division by controlling a set of genes required for this process. One of the activated genes is an inhibitor of cyclin-dependent kinases. Apoptosis induction seems to be mediated either by stimulation of BAX and FAS antigen expression, or by repression of Bcl-2 expression. Its pro-apoptotic activity is activated via its intera [...] | 0.999 |
| <b>CASP3</b> | BAX   | ENSP00000311032 | ENSP00000293288 | Caspase-3 subunit p12; Involved in the activation cascade of caspases responsible for apoptosis execution. At the onset of apoptosis it proteolytically cleaves poly(ADP-ribose) polymerase (PARP) at a '216-Asp- -Gly-217' bond. Cleaves and activates sterol regulatory element binding proteins (SREBPs) between the basic helix-loop-helix leucine zipper domain and the membrane attachment domain. Cleaves and activates caspase-6, -7 and -9. Involved in the cleavage of huntingtin. Triggers cell adhesion in sympathetic neurons through RET cleavage.        | Apoptosis regulator BAX; Plays a role in the mitochondrial apoptotic process. Under normal conditions, BAX is largely cytosolic via constant retrotranslocation from mitochondria to the cytosol mediated by BCL2L1/Bcl-xL, which avoids accumulation of toxic BAX levels at the mitochondrial outer membrane (MOM). Under stress conditions, undergoes a conformation change that causes translocation to the mitochondrion membrane, leading to the release of cytochrome c that then triggers apoptosis. Promotes activation of CASP3, and thereby apoptosis.                                                       | 0.884 |
| <b>CASP3</b> | BCL2  | ENSP00000311032 | ENSP00000381185 | Caspase-3 subunit p12; Involved in the activation cascade of caspases responsible for apoptosis execution. At the onset of apoptosis it proteolytically cleaves poly(ADP-ribose) polymerase (PARP) at a '216-Asp- -Gly-217' bond. Cleaves and activates sterol regulatory element binding proteins (SREBPs) between the basic helix-loop-helix leucine zipper domain and the membrane attachment domain. Cleaves and activates caspase-6, -7 and -9. Involved in the cleavage of huntingtin. Triggers cell adhesion in sympathetic neurons through RET cleavage.        | Apoptosis regulator Bcl-2; Suppresses apoptosis in a variety of cell systems including factor-dependent lymphohematopoietic and neural cells. Regulates cell death by controlling the mitochondrial membrane permeability. Appears to function in a feedback loop system with caspases. Inhibits caspase activity either by preventing the release of cytochrome c from the mitochondria and/or by binding to the apoptosis-activating factor (APAF-1). May attenuate inflammation by impairing NLRP1-inflammasome activation, hence CASP1 activation and IL1B release.                                                | 0.987 |
| <b>CASP3</b> | CYCS  | ENSP00000311032 | ENSP00000307786 | Caspase-3 subunit p12; Involved in the activation cascade of caspases responsible for apoptosis execution. At the onset of apoptosis it proteolytically cleaves poly(ADP-ribose) polymerase (PARP) at a '216-Asp- -Gly-217' bond. Cleaves and                                                                                                                                                                                                                                                                                                                           | Cytochrome c; Electron carrier protein. The oxidized form of the cytochrome c heme group can accept an electron from the heme group of the cytochrome c1 subunit of cytochrome reductase. Cytochrome c then transfers this electron to the cytochrome oxidase complex, the final protein                                                                                                                                                                                                                                                                                                                               | 0.997 |



|              |       |                 |                 |                                                                                                                                                                                                                                                                                                                                                                                                                                                                                                                                                                  |                                                                                                                                                                                                                                                                                                                                                                                                                                                                                                                                                                                                                        |       |
|--------------|-------|-----------------|-----------------|------------------------------------------------------------------------------------------------------------------------------------------------------------------------------------------------------------------------------------------------------------------------------------------------------------------------------------------------------------------------------------------------------------------------------------------------------------------------------------------------------------------------------------------------------------------|------------------------------------------------------------------------------------------------------------------------------------------------------------------------------------------------------------------------------------------------------------------------------------------------------------------------------------------------------------------------------------------------------------------------------------------------------------------------------------------------------------------------------------------------------------------------------------------------------------------------|-------|
|              |       |                 |                 | activates sterol regulatory element binding proteins (SREBPs) between the basic helix-loop-helix leucine zipper domain and the membrane attachment domain. Cleaves and activates caspase-6, -7 and -9. Involved in the cleavage of huntingtin. Triggers cell adhesion in sympathetic neurons through RET cleavage.                                                                                                                                                                                                                                               | carrier in the mitochondrial electron-transport chain.                                                                                                                                                                                                                                                                                                                                                                                                                                                                                                                                                                 |       |
| <b>CASP3</b> | TP53  | ENSP00000311032 | ENSP00000269305 | Caspase-3 subunit p12; Involved in the activation cascade of caspases responsible for apoptosis execution. At the onset of apoptosis it proteolytically cleaves poly(ADP-ribose) polymerase (PARP) at a '216-Asp- -Gly-217' bond. Cleaves and activates sterol regulatory element binding proteins (SREBPs) between the basic helix-loop-helix leucine zipper domain and the membrane attachment domain. Cleaves and activates caspase-6, -7 and -9. Involved in the cleavage of huntingtin. Triggers cell adhesion in sympathetic neurons through RET cleavage. | Cellular tumor antigen p53; Acts as a tumor suppressor in many tumor types; induces growth arrest or apoptosis depending on the physiological circumstances and cell type. Involved in cell cycle regulation as a trans-activator that acts to negatively regulate cell division by controlling a set of genes required for this process. One of the activated genes is an inhibitor of cyclin-dependent kinases. Apoptosis induction seems to be mediated either by stimulation of BAX and FAS antigen expression, or by repression of Bcl-2 expression. Its pro-apoptotic activity is activated via its intera [...] | 0.956 |
| <b>CYCS</b>  | BAX   | ENSP00000307786 | ENSP00000293288 | Cytochrome c; Electron carrier protein. The oxidized form of the cytochrome c heme group can accept an electron from the heme group of the cytochrome c1 subunit of cytochrome reductase. Cytochrome c then transfers this electron to the cytochrome oxidase complex, the final protein carrier in the mitochondrial electron-transport chain.                                                                                                                                                                                                                  | Apoptosis regulator BAX; Plays a role in the mitochondrial apoptotic process. Under normal conditions, BAX is largely cytosolic via constant retrotranslocation from mitochondria to the cytosol mediated by BCL2L1/Bcl-xL, which avoids accumulation of toxic BAX levels at the mitochondrial outer membrane (MOM). Under stress conditions, undergoes a conformation change that causes translocation to the mitochondrion membrane, leading to the release of cytochrome c that then triggers apoptosis. Promotes activation of CASP3, and thereby apoptosis.                                                       | 0.993 |
| <b>CYCS</b>  | BCL2  | ENSP00000307786 | ENSP00000381185 | Cytochrome c; Electron carrier protein. The oxidized form of the cytochrome c heme group can accept an electron from the heme group of the cytochrome c1 subunit of cytochrome reductase. Cytochrome c then transfers this electron to the cytochrome oxidase complex, the final protein carrier in the mitochondrial electron-transport chain.                                                                                                                                                                                                                  | Apoptosis regulator Bcl-2; Suppresses apoptosis in a variety of cell systems including factor-dependent lymphohematopoietic and neural cells. Regulates cell death by controlling the mitochondrial membrane permeability. Appears to function in a feedback loop system with caspases. Inhibits caspase activity either by preventing the release of cytochrome c from the mitochondria and/or by binding to the apoptosis-activating factor (APAF-1). May attenuate inflammation by impairing NLRP1-inflammasome activation, hence CASP1 activation and IL1B release.                                                | 0.997 |
| <b>CYCS</b>  | CASP3 | ENSP00000307786 | ENSP00000311032 | Cytochrome c; Electron carrier protein. The oxidized form of the cytochrome c heme group can accept an electron from the heme group of the cytochrome c1 subunit of cytochrome reductase. Cytochrome c then transfers this electron to the cytochrome oxidase complex, the final protein carrier in the mitochondrial electron-transport chain.                                                                                                                                                                                                                  | Caspase-3 subunit p12; Involved in the activation cascade of caspases responsible for apoptosis execution. At the onset of apoptosis it proteolytically cleaves poly(ADP-ribose) polymerase (PARP) at a '216-Asp- -Gly-217' bond. Cleaves and activates sterol regulatory element binding proteins (SREBPs) between the basic helix-loop-helix leucine zipper domain and the membrane attachment domain. Cleaves and activates caspase-6, -7 and -9. Involved in the cleavage of huntingtin. Triggers cell adhesion in sympathetic neurons through RET cleavage.                                                       | 0.997 |
| <b>CYCS</b>  | TP53  | ENSP00000307786 | ENSP00000269305 | Cytochrome c; Electron carrier protein. The oxidized form of the cytochrome c heme group can accept an electron from the heme group of the cytochrome c1 subunit of cytochrome reductase. Cytochrome c then transfers this electron to the cytochrome oxidase complex, the final protein carrier in the mitochondrial electron-transport chain.                                                                                                                                                                                                                  | Cellular tumor antigen p53; Acts as a tumor suppressor in many tumor types; induces growth arrest or apoptosis depending on the physiological circumstances and cell type. Involved in cell cycle regulation as a trans-activator that acts to negatively regulate cell division by controlling a set of genes required for this process. One of the activated genes is an inhibitor of cyclin-dependent kinases. Apoptosis induction seems to be mediated either by stimulation of BAX and FAS antigen expression, or by repression of Bcl-2 expression. Its pro-apoptotic activity is activated via its intera [...] | 0.911 |
| <b>TP53</b>  | BAX   | ENSP00000269305 | ENSP00000293288 | Cellular tumor antigen p53; Acts as a tumor suppressor in many tumor types; induces growth arrest or apoptosis depending on the physiological circumstances and cell type. Involved in cell cycle regulation as a trans-activator that acts to negatively regulate cell division by controlling a set of genes required for this process. One of the activated genes is an inhibitor of cyclin-                                                                                                                                                                  | Apoptosis regulator BAX; Plays a role in the mitochondrial apoptotic process. Under normal conditions, BAX is largely cytosolic via constant retrotranslocation from mitochondria to the cytosol mediated by BCL2L1/Bcl-xL, which avoids accumulation of toxic BAX levels at the mitochondrial outer membrane (MOM). Under stress conditions, undergoes a conformation change that causes translocation to the mitochondrion membrane, leading to                                                                                                                                                                      | 0.994 |

|             |       |                 |                 |                                                                                                                                                                                                                                                                                                                                                                                                                                                                                                                                                                                                                        |                                                                                                                                                                                                                                                                                                                                                                                                                                                                                                                                                                         |       |
|-------------|-------|-----------------|-----------------|------------------------------------------------------------------------------------------------------------------------------------------------------------------------------------------------------------------------------------------------------------------------------------------------------------------------------------------------------------------------------------------------------------------------------------------------------------------------------------------------------------------------------------------------------------------------------------------------------------------------|-------------------------------------------------------------------------------------------------------------------------------------------------------------------------------------------------------------------------------------------------------------------------------------------------------------------------------------------------------------------------------------------------------------------------------------------------------------------------------------------------------------------------------------------------------------------------|-------|
|             |       |                 |                 | dependent kinases. Apoptosis induction seems to be mediated either by stimulation of BAX and FAS antigen expression, or by repression of Bcl-2 expression. Its pro-apoptotic activity is activated via its intera [...]                                                                                                                                                                                                                                                                                                                                                                                                | the release of cytochrome c that then triggers apoptosis. Promotes activation of CASP3, and thereby apoptosis.                                                                                                                                                                                                                                                                                                                                                                                                                                                          |       |
| <b>TP53</b> | BCL2  | ENSP00000269305 | ENSP00000381185 | Cellular tumor antigen p53; Acts as a tumor suppressor in many tumor types; induces growth arrest or apoptosis depending on the physiological circumstances and cell type. Involved in cell cycle regulation as a trans-activator that acts to negatively regulate cell division by controlling a set of genes required for this process. One of the activated genes is an inhibitor of cyclin-dependent kinases. Apoptosis induction seems to be mediated either by stimulation of BAX and FAS antigen expression, or by repression of Bcl-2 expression. Its pro-apoptotic activity is activated via its intera [...] | Apoptosis regulator Bcl-2; Suppresses apoptosis in a variety of cell systems including factor-dependent lymphohematopoietic and neural cells. Regulates cell death by controlling the mitochondrial membrane permeability. Appears to function in a feedback loop system with caspases. Inhibits caspase activity either by preventing the release of cytochrome c from the mitochondria and/or by binding to the apoptosis-activating factor (APAF-1). May attenuate inflammation by impairing NLRP1-inflammasome activation, hence CASP1 activation and IL1B release. | 0.999 |
| <b>TP53</b> | CASP3 | ENSP00000269305 | ENSP00000311032 | Cellular tumor antigen p53; Acts as a tumor suppressor in many tumor types; induces growth arrest or apoptosis depending on the physiological circumstances and cell type. Involved in cell cycle regulation as a trans-activator that acts to negatively regulate cell division by controlling a set of genes required for this process. One of the activated genes is an inhibitor of cyclin-dependent kinases. Apoptosis induction seems to be mediated either by stimulation of BAX and FAS antigen expression, or by repression of Bcl-2 expression. Its pro-apoptotic activity is activated via its intera [...] | Caspase-3 subunit p12; Involved in the activation cascade of caspases responsible for apoptosis execution. At the onset of apoptosis it proteolytically cleaves poly(ADP-ribose) polymerase (PARP) at a '216-Asp- -Gly-217' bond. Cleaves and activates sterol regulatory element binding proteins (SREBPs) between the basic helix-loop-helix leucine zipper domain and the membrane attachment domain. Cleaves and activates caspase-6, -7 and -9. Involved in the cleavage of huntingtin. Triggers cell adhesion in sympathetic neurons through RET cleavage.        | 0.956 |
| <b>TP53</b> | CYCS  | ENSP00000269305 | ENSP00000307786 | Cellular tumor antigen p53; Acts as a tumor suppressor in many tumor types; induces growth arrest or apoptosis depending on the physiological circumstances and cell type. Involved in cell cycle regulation as a trans-activator that acts to negatively regulate cell division by controlling a set of genes required for this process. One of the activated genes is an inhibitor of cyclin-dependent kinases. Apoptosis induction seems to be mediated either by stimulation of BAX and FAS antigen expression, or by repression of Bcl-2 expression. Its pro-apoptotic activity is activated via its intera [...] | Cytochrome c; Electron carrier protein. The oxidized form of the cytochrome c heme group can accept an electron from the heme group of the cytochrome c1 subunit of cytochrome reductase. Cytochrome c then transfers this electron to the cytochrome oxidase complex, the final protein carrier in the mitochondrial electron-transport chain.                                                                                                                                                                                                                         | 0.911 |

## References

1. Kanehisa M, Goto S. KEGG: kyoto encyclopedia of genes and genomes. *Nucleic Acids Res.* 2000;28(1):27-30.
2. Hendrata M, Sudiono J. A Computational Model for Investigating Tumor Apoptosis Induced by Mesenchymal Stem Cell-Derived Secretome. *Computational and mathematical methods in medicine.* 2016;2016:4910603.
3. Szklarczyk D, Gable AL, Nastou KC, Lyon D, Kirsch R, Pyysalo S, et al. The STRING database in 2021: customizable protein-protein networks, and functional characterization of user-uploaded gene/measurement sets. *Nucleic Acids Res.* 2021;49(D1):D605-d12.
4. Arulselvan P, Tan WS, Gothai S, Muniandy K, Fakurazi S, Esa NM, et al. Anti-Inflammatory Potential of Ethyl Acetate Fraction of *Moringa oleifera* in Downregulating the NF- $\kappa$ B Signaling Pathway in Lipopolysaccharide-Stimulated Macrophages. *Molecules (Basel, Switzerland).* 2016;21(11).
5. Khan MM, Gandhi C, Chauhan N, Stevens JW, Motto DG, Lentz SR, et al. Alternatively-spliced extra domain A of fibronectin promotes acute inflammation and brain injury after cerebral ischemia in mice. *Stroke.* 2012;43(5):1376-82.
